# Supplementary material
Source: Research Square preprint supplement (doi:10.21203/rs.3.rs-8729661/v1)
Supplement: Supplementary file 1 [file ee9d78f8ff27a0e3bb25d350.docx]

**Table S1.** Exploratory within-category paired comparisons for Satisfaction (question-level medians).

Wilcoxon signed-rank; HL = Hodges-Lehmann (Model A (GPT-OSS-20B) − Model B (MedGemma-27B-Instruct)); BH-FDR p_adj is adjusted across 6 categories (Satisfaction only).

| **Category** | **N questions in category** | **GPT-OSS-20B: Median (IQR)** | **MedGemma 27B: Median (IQR)** | **HL diff [95% CI]** | **RBC** | **Wilcoxon p** | **BH-FDR p_adj (6 tests)** |
| --- | --- | --- | --- | --- | --- | --- | --- |
| Basic Information & Diagnosis | 12 | 5.0 (4.0-5.0) | 4.0 (4.0-4.0) | 1.0 [0.0, 1.0] | 0.750 | 0.0703 | 0.094 |
| Follow-up & Prognosis | 8 | 4.5 (4.0-5.0) | 4.5 (4.0-5.0) | 0.0 [-0.5, 0.5] | 0.500 | 1.0000 | 1.000 |
| Lifestyle & Nutrition | 8 | 5.0 (4.0-5.0) | 4.0 (4.0-4.5) | 0.5 [0.0, 1.0] | 0.625 | 0.1250 | 0.150 |
| Postoperative Life | 12 | 5.0 (4.8-5.0) | 4.0 (4.0-4.8) | 0.5 [0.0, 1.0] | 0.833 | 0.0312 | 0.094 |
| Special Situations | 5 | 5.0 (4.0-5.0) | 4.0 (4.0-4.0) | 1.0 [0.0, 1.0] | 0.900 | 0.5000 | 0.600 |
| Treatment & Surgery | 15 | 5.0 (4.0-5.0) | 4.0 (4.0-4.0) | 1.0 [0.0, 1.0] | 1.000 | 0.0027 | 0.016 |
